# Supplementary material for: Comparative Effectiveness of Collaborative Treatment with Korean and Western Medicine for Low Back Pain: A Prospective Cohort Study
Source: Hindawi journal article supplement (doi:10.1155/2021/5535857), 2021-07-28
Supplement: f1 [file 5535857.f1.pdf]

# Clinical Pathway for collaborative treatment between Korean medicine and Western medicine

## 1. Clinical pathway for collaborative treatment of low back pain

-Suwon Mokhuri Korean Medicine Hospital

<Clinical Pathway process>

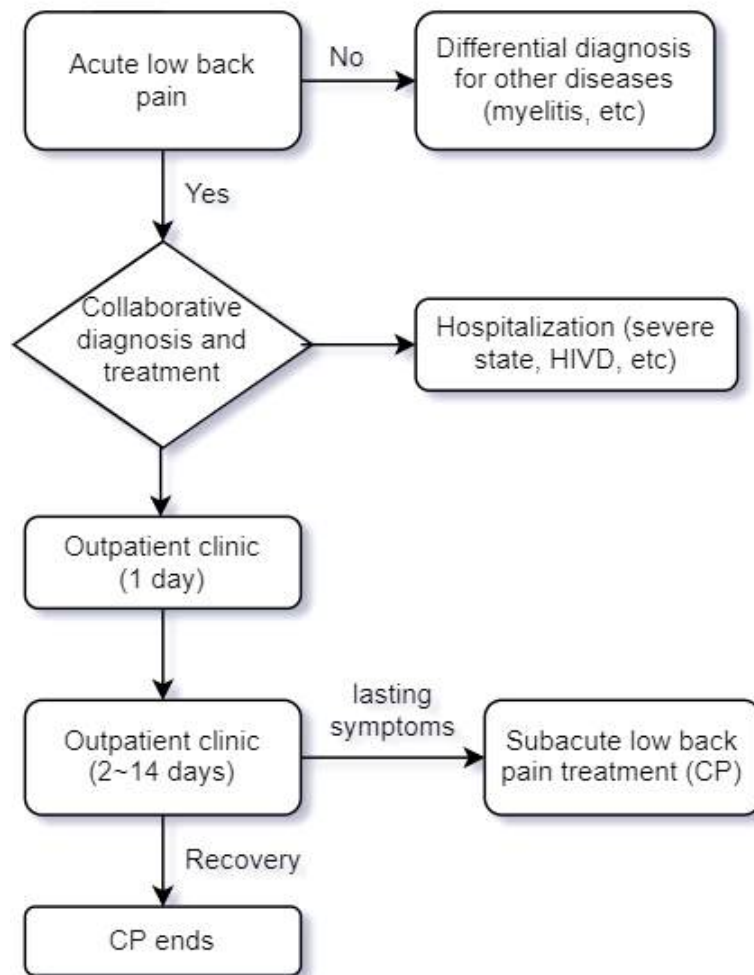

<Treatment Plan>

|                              | Day 1                                                                                                                        | Day 2~7                                                                                                                  | Day 8~14                                                                                                                 |
|------------------------------|------------------------------------------------------------------------------------------------------------------------------|--------------------------------------------------------------------------------------------------------------------------|--------------------------------------------------------------------------------------------------------------------------|
| 1. Evaluation & observation  | 1. Past medical history, treatment history<br>2. Evaluation of the severity of pain<br>3. Evaluation of daily function (ODI) | 1. Evaluation of the severity of pain (VAS)<br>2. Evaluation of daily function (ODI)                                     | 1. Evaluation of the severity of pain (VAS)<br>2. Evaluation of daily function (ODI)                                     |
| 2. Diet                      | Ordinary diet (no drinking or smoking)                                                                                       | Ordinary diet (no drinking or smoking)                                                                                   | Ordinary diet (no drinking or smoking)                                                                                   |
| 3. Examination               | 1. X-ray<br>2. L-spine MRI                                                                                                   |                                                                                                                          |                                                                                                                          |
| 4. Prescription              | 1. WM : analgesic, antiphlogistic<br>2. KM : herbal medicine                                                                 | 1. WM : analgesic, antiphlogistic<br>2. KM : herbal medicine                                                             | 1. WM : analgesic, antiphlogistic<br>2. KM : herbal medicine                                                             |
| 5. Treatment                 | 1. WM : physical therapy (electric stimulation), kinesitherapy<br>2. KM : acupuncture, KM physiatrics                        | 1. WM : physical therapy (electric stimulation), kinesitherapy<br>2. KM : acupuncture, KM physiatrics                    | 1. WM : physical therapy (electric stimulation), kinesitherapy<br>2. KM : acupuncture, KM physiatrics                    |
| 6. Education and explanation | 1. Explain treatment and prognosis<br>2. Lower back stretching education<br>3. Lower back muscle strengthening education     | 1. Explain treatment and prognosis<br>2. Lower back stretching education<br>3. Lower back muscle strengthening education | 1. Explain treatment and prognosis<br>2. Lower back stretching education<br>3. Lower back muscle strengthening education |

## 2. Clinical pathway for collaborative treatment of low back sprain

- Kyung Hee University Korean Medicine Hospital at Gangdong

<Clinical Pathway process>

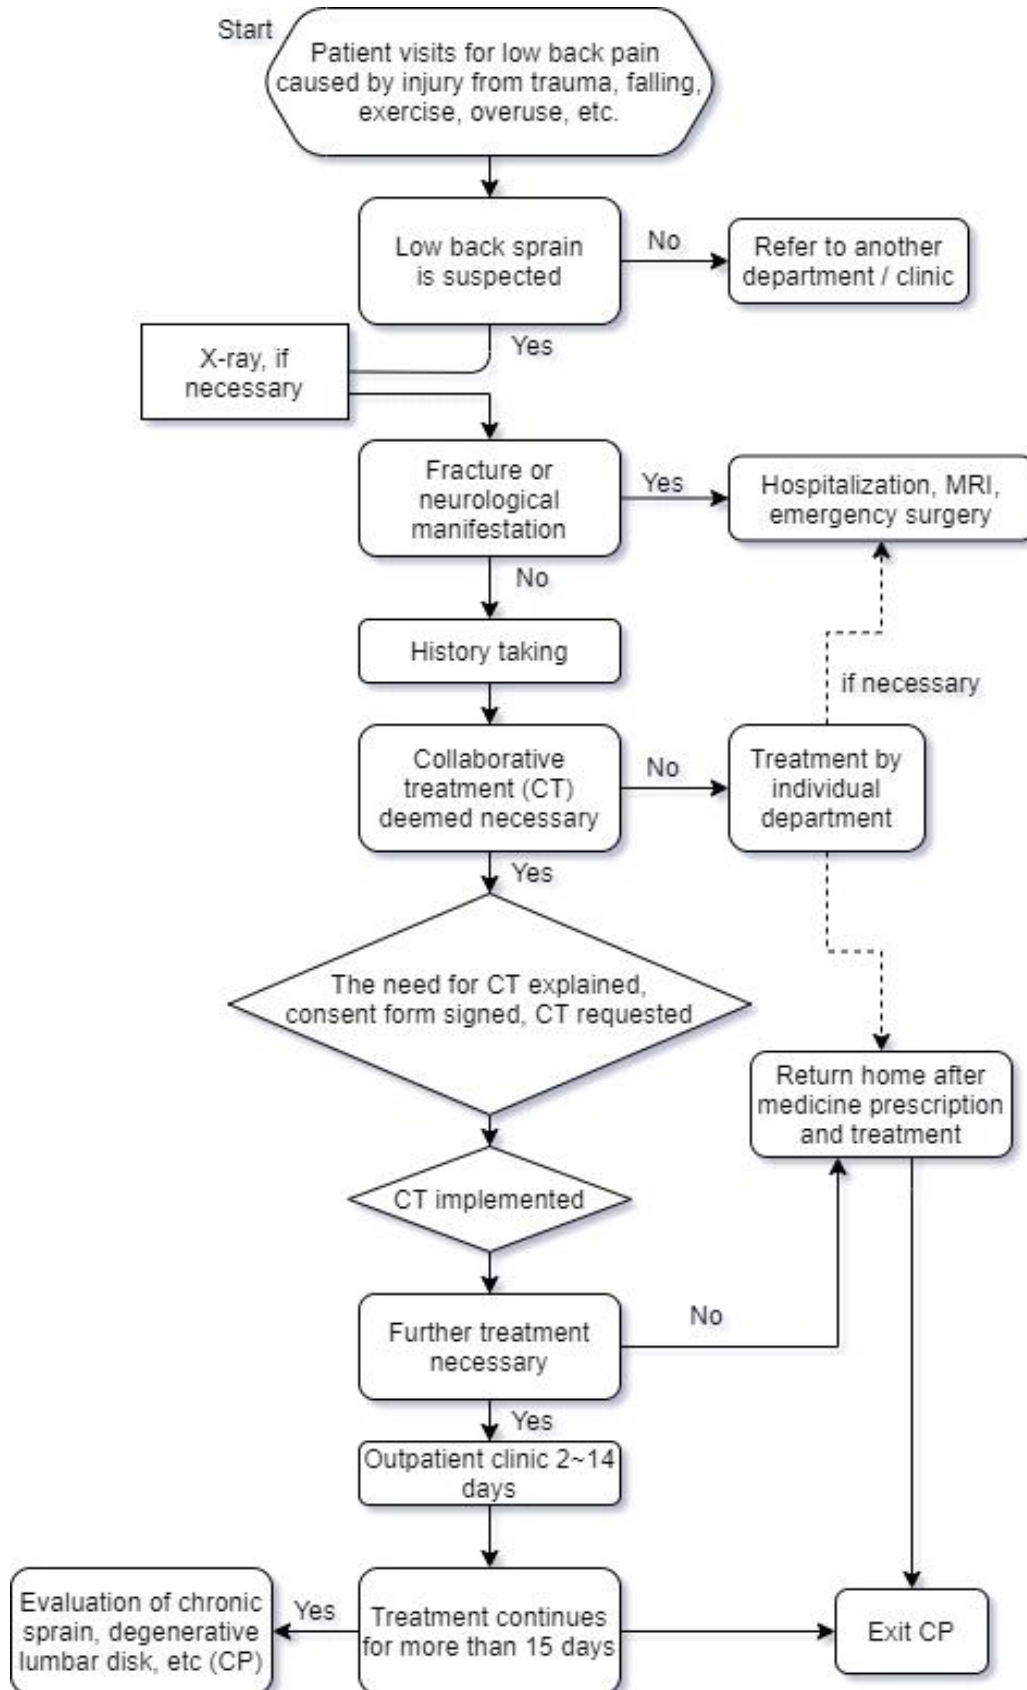

<Treatment Plan>

|                              | Day 1                                                                                                                   | Day 2~14                                                                              | After Day 14                                                                          |
|------------------------------|-------------------------------------------------------------------------------------------------------------------------|---------------------------------------------------------------------------------------|---------------------------------------------------------------------------------------|
| 1. Evaluation & observation  | 1. Past medical history, treatment history<br>2. Inspection for damage from injury or trauma<br>3. Physical examination | 1. Progress observation and clinical evaluation                                       | 1. Progress observation and clinical evaluation                                       |
| 2. Examination               | 1. X-ray<br>2. Lumbar MRI, if necessary                                                                                 | 1. Lumbar MRI, if necessary                                                           | 1. Examination for differential diagnosis                                             |
| 3. CT                        | 1. CT request / reply<br>2. f/u 2 weeks after the first visit                                                           | 1. CT request / reply                                                                 | 1. CT request / reply                                                                 |
| 4. Prescription              | 1. WM : medication, injection<br>2. KM : herbal medicine, herbal acupuncture                                            | 1. WM : medication, injection<br>2. KM : herbal medicine, herbal acupuncture          | 1. WM : medication, injection<br>2. KM : herbal medicine, herbal acupuncture          |
| 5. Treatment                 | 1. WM : physical therapy, kinesitherapy<br>2. KM : acupuncture, KM physiatrics, Chuna                                   | 1. WM : physical therapy, kinesitherapy<br>2. KM : acupuncture, KM physiatrics, Chuna | 1. WM : physical therapy, kinesitherapy<br>2. KM : acupuncture, KM physiatrics, Chuna |
| 6. Education and explanation | 1. Explain treatment and prognosis<br>2. Posture and exercise education                                                 | 1. Explain treatment and prognosis<br>2. Posture and exercise education               | 1. Explain treatment and prognosis<br>2. Posture and exercise education               |

### 3. Clinical pathway for collaborative treatment of lumbar herniated intervertebral disc

- Dong-eui University Korean Medicine Hospital

<Clinical Pathway process>

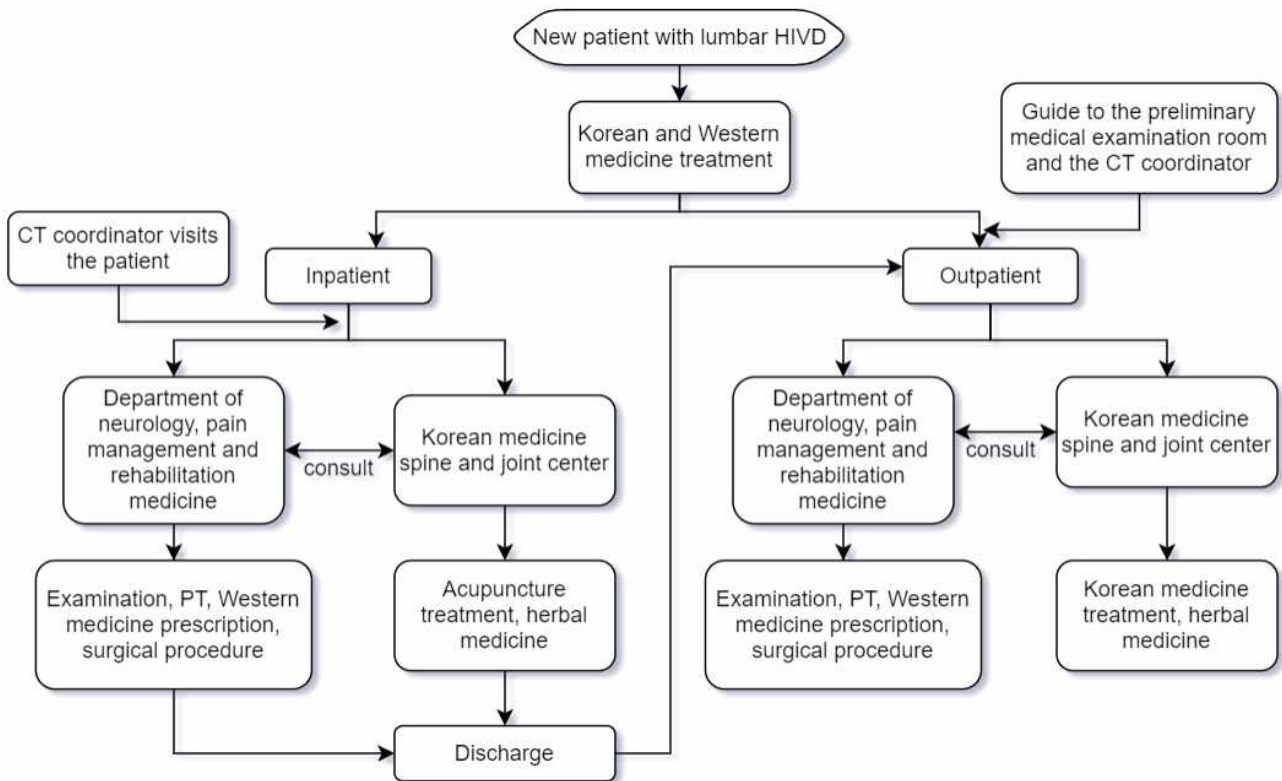

<Treatment Plan>

|                              | Day 1                                                                                                                                                                                                            | Day 2~14                                                                                                                                                                                                         | Day 15~30                                                                                                                                                                                                        |
|------------------------------|------------------------------------------------------------------------------------------------------------------------------------------------------------------------------------------------------------------|------------------------------------------------------------------------------------------------------------------------------------------------------------------------------------------------------------------|------------------------------------------------------------------------------------------------------------------------------------------------------------------------------------------------------------------|
| 1. Evaluation & observation  | 1. Past medical history, treatment history<br>2. Physical examination<br>3. Evaluation of the severity of pain and daily function<br>4. V/S measurement                                                          | 1. Evaluation of the severity of pain and daily function<br>2. V/S measurement                                                                                                                                   | 1. Evaluation of the severity of pain and daily function<br>2. V/S measurement                                                                                                                                   |
| 2. Diet                      | Ordinary diet (no drinking or smoking)                                                                                                                                                                           | Ordinary diet (no drinking or smoking)                                                                                                                                                                           | Ordinary diet (no drinking or smoking)                                                                                                                                                                           |
| 3. Examination               | 1. X-ray<br>2. CT or MRI                                                                                                                                                                                         |                                                                                                                                                                                                                  |                                                                                                                                                                                                                  |
| 4. Prescription              | 1. WM : medication, regional nerve block, etc<br>2. KM : herbal medicine, powdered medicine                                                                                                                      | 1. WM : medication, regional nerve block<br>2. KM : herbal medicine, powdered medicine                                                                                                                           | 1. WM : medication, regional nerve block<br>2. KM : herbal medicine, powdered medicine                                                                                                                           |
| 5. Treatment                 | 1. WM : physical therapy (electric stimulation), kinesitherapy, manual therapy<br>2. KM : acupuncture, moxibustion, cupping therapy, acupotomy, herbal acupuncture, embedding acupuncture, Chuna, KM physiatrics | 1. WM : physical therapy (electric stimulation), kinesitherapy, manual therapy<br>2. KM : acupuncture, moxibustion, cupping therapy, acupotomy, herbal acupuncture, embedding acupuncture, Chuna, KM physiatrics | 1. WM : physical therapy (electric stimulation), kinesitherapy, manual therapy<br>2. KM : acupuncture, moxibustion, cupping therapy, acupotomy, herbal acupuncture, embedding acupuncture, Chuna, KM physiatrics |
| 6. Education and explanation | 1. Explain treatment and prognosis<br>2. Daily habit training and posture correction<br>3. Exercise education                                                                                                    | 1. Explain treatment and prognosis<br>2. Daily habit training and posture correction<br>3. Exercise education                                                                                                    | 1. Explain treatment and prognosis<br>2. Daily habit training and posture correction<br>3. Exercise education                                                                                                    |

#### 4. Clinical pathway for collaborative treatment of lumbar intervertebral disc disorder

- Maru Korean Medicine Hospital

<Clinical Pathway process>

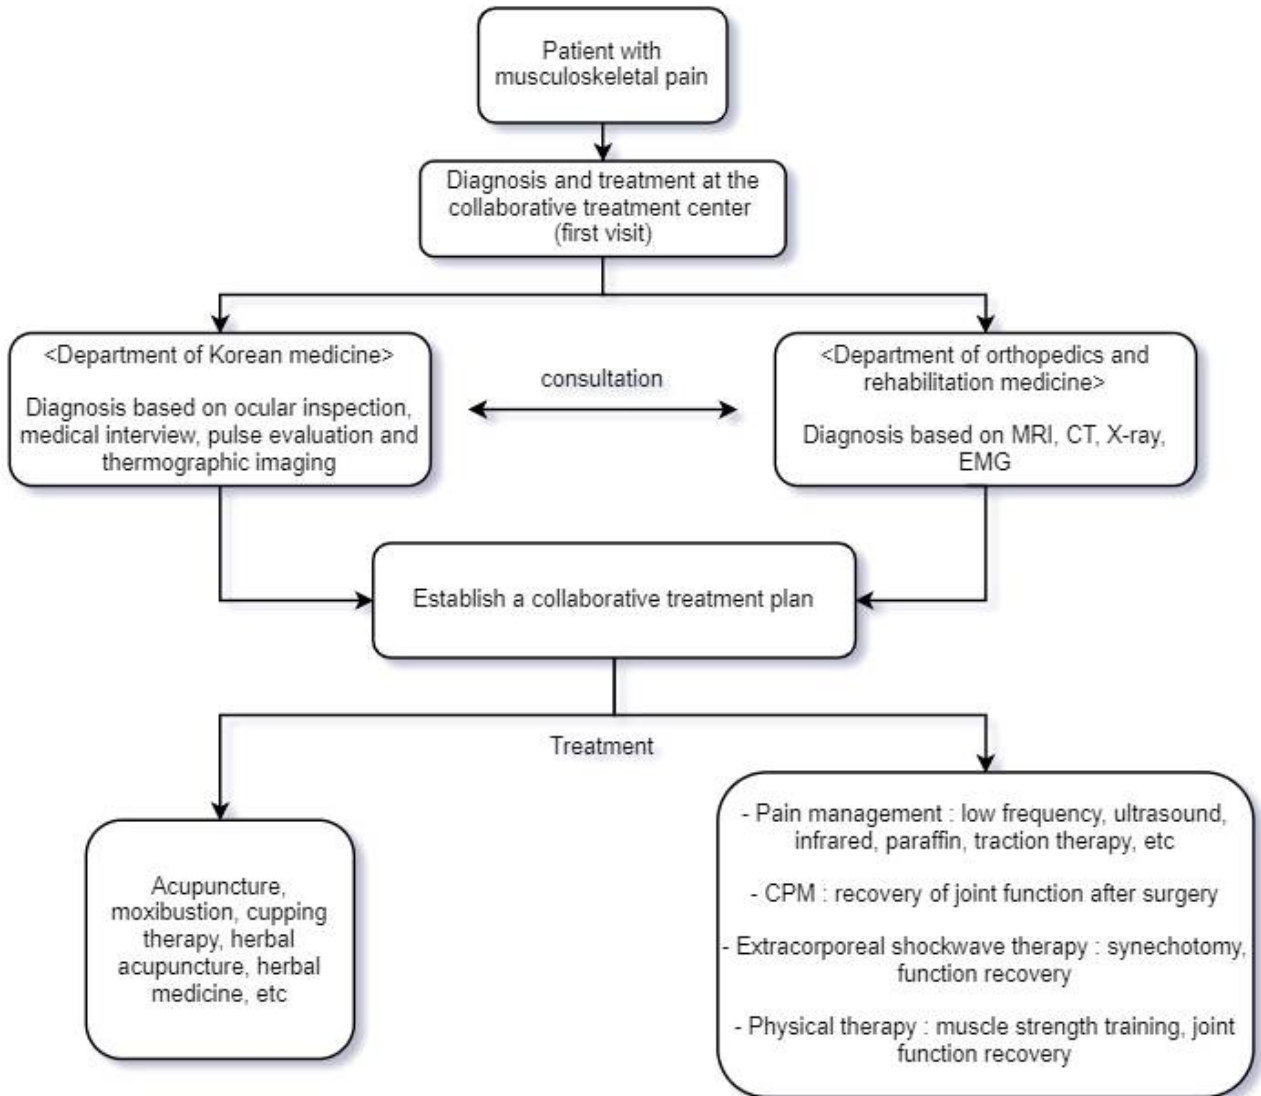

<Sports injury Treatment Plan>

|                              | Day 1                                                                                                                                                  | Day 2~14                                                                                                                               | Day 15~30                                                                                                                              |
|------------------------------|--------------------------------------------------------------------------------------------------------------------------------------------------------|----------------------------------------------------------------------------------------------------------------------------------------|----------------------------------------------------------------------------------------------------------------------------------------|
| 1. Evaluation & observation  | 1. Past medical history, treatment history<br>2. Evaluation of criticality of sports in patient's life<br>3. Acuity or chronicity of the sports injury | 1. Evaluation of recovery from acute damage                                                                                            | 1. Evaluation of possibility of return to sports                                                                                       |
| 2. Diet                      | Ordinary diet (no drinking or smoking)                                                                                                                 | Ordinary diet (no drinking or smoking)                                                                                                 | Ordinary diet (no drinking or smoking)                                                                                                 |
| 3. Examination               | 1. X-ray, CT, MRI, EMG, etc<br>2. Diagnosis from ocular inspection, pulse, patient interview, thermographic imaging                                    |                                                                                                                                        |                                                                                                                                        |
| 4. Prescription              | 1. WM : steroids, antiphlogistic, analgesic<br>2. KM : herbal medicine                                                                                 | 1. WM : steroids, antiphlogistic, analgesic<br>2. KM : herbal medicine                                                                 | 1. WM : steroids, antiphlogistic, analgesic<br>2. KM : herbal medicine                                                                 |
| 5. Treatment                 | 1. WM : physical therapy (electric stimulation), kinesitherapy<br>2. KM : acupuncture, KM physiatrics                                                  | 1. WM : physical therapy (electric stimulation), kinesitherapy<br>2. KM : acupuncture, KM physiatrics                                  | 1. WM : physical therapy (electric stimulation), kinesitherapy<br>2. KM : acupuncture, KM physiatrics                                  |
| 6. Education and explanation | 1. Explain treatment and prognosis<br>2. Education to recover damaged muscles, joints and tendons, and education to prevent recurrence                 | 1. Explain treatment and prognosis<br>2. Education to recover damaged muscles, joints and tendons, and education to prevent recurrence | 1. Explain treatment and prognosis<br>2. Education to recover damaged muscles, joints and tendons, and education to prevent recurrence |
